# Supplementary material for: Beta-glucan quantification by fluorescence analysis using photonic crystals
Source: Royal Society of Chemistry journal article supplement (doi:10.1039/c6ra02304e), 2016-01-01
Supplement: c6ra02304e1.pdf [file c6ra02304e1.pdf]

## Beta-glucan quantification by fluorescence analysis using photonic crystal

Jiaoyu Ren,<sup>a</sup> Hongyun Xuan,<sup>a</sup> Yanxi Zhu,<sup>a</sup> Xuefan Liu,<sup>a</sup> Liqin Ge<sup>a</sup>

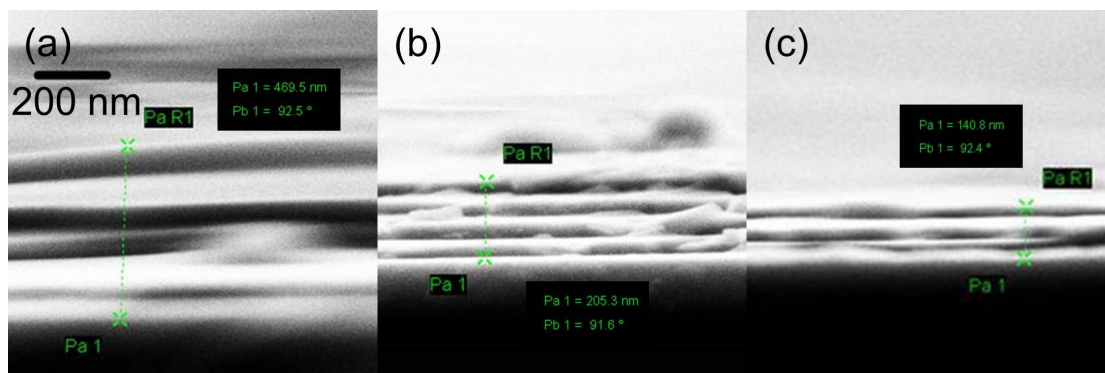

Figure S1 SEM images of TiO<sub>2</sub>/GO hydrogel 1DPhCs with Au fabricated at different speed of spin coating (a) 2000rpm; (b) 3500 rpm; (c) 5000rpm.

Table S1 Thickness of TiO<sub>2</sub>/GO hydrogel 1DPhCs with Au fabricated at different speed of spin coating.

| Speed/ rpm    | 2000 | 3500 | 5000 |
|---------------|------|------|------|
| Thickness/ nm | 469  | 205  | 141  |

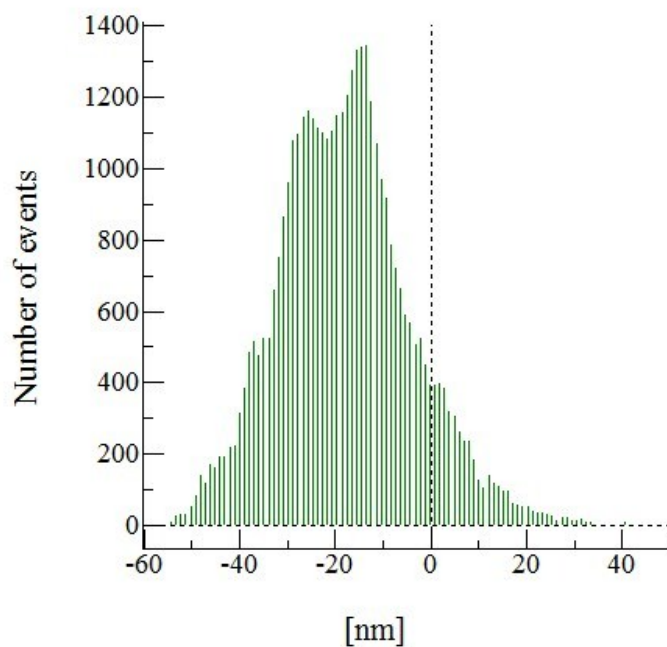

Figure S2 Assessing the roughness of 1DPhC with Au
